# Supplementary material for: A practical guide for mutational signature analysis in hematological malignancies
Source: PubMed Central journal article supplement (PMC6611883; doi:10.1038/s41467-019-11037-8), 2019-07-05
Supplement: 41467_2019_11037_MOESM3_ESM.pdf [file 41467_2019_11037_MOESM3_ESM.pdf]

## **Description of Additional Supplementary Files**

File Name: Supplementary Data 1

Description: Assignment of signatures. Each of the signatures extracted with either `mutationalPatterns` or the method from Alexandrov et al. were assigned to one or a combination of two COSMIC signatures. To do so, cosine similarities between the extracted signatures and each COSMIC signature, or a linear combination of two COSMIC signatures (using non-negative least squares R package `NNLS`), were computed.

File Name: Supplementary Data 2

Description: Summary of clinical and biological features of 143 chronic lymphocytic leukemia myeloma samples.

File Name: Supplementary Software 1

Description: R used to generate signature data for multiple myeloma genomes using `mutationalPatterns` in the paper

File Name: Supplementary Software 2

Description: R used to generate signature data for chronic lymphocytic leukemia genomes using `mutationalPatterns` in the paper

File Name: Supplementary Software 3

Description: R used to generate signature data for acute myeloid leukemia genomes using `mutationalPatterns` in the paper
